# Supplementary material for: Clean Power Transition Triggers Carbon Rebound in Steel Sector via Cost-Driven Technology Regression
Source: Research Square preprint supplement (doi:10.21203/rs.3.rs-6893205/v1), 2025-08-04
Supplement: Supplementary file 1 [file 28ba4b1d9548b9f8bcc0b3ca.docx]

**Supplementary Note 1: E3ME Series**

The E3ME (Energy-Environment-Economy Macro-Econometric) model is a highly disaggregated, multi-sector, and multi-region, demand-driven global macro econometric and dynamic input-output model. This model has been widely applied in fields such as climate policy, energy transition, and industrial restructuring1,2,3*.* The E3ME model covers 71 regions globally, including all EU member states and G20 countries, and further subdivides each region into 43 economic sectors (with up to 70 sectors in the EU and the UK). Economic connections between global regions are established through bilateral trade equations, and the supply-demand relationships between sectors are modeled using input-output tables.

The E3ME model is built upon a highly empirical set of econometric regression equations. Core variables such as consumption, investment, employment, wages, prices, imports, and capacity expansion are estimated using historical data, and an Error Correction Mechanism (ECM) is used to ensure that short-term dynamic results converge to long-term trends. The model is demand-driven, meaning that demand for final goods and services is estimated first, and then the supply of intermediate goods required to meet this demand is determined using input-output tables and bilateral trade relationships between all regions, thereby representing the complete economic circulation. Unlike traditional general equilibrium models, E3ME is based on post-Keynesian economic theory and does not assume market equilibrium. Instead, it allows for the presence of unemployed labor and idle capacity, capturing the economic growth effects once these idle resources are utilized. Moreover, technological progress in the E3ME model is endogenous, driven by cumulative investment and research and development (R&D) expenditure, forming a dynamic feedback loop between investment, technology, prices, consumption, output, and investment. The full set of equations underpinning the framework is given and explained in Mercure et al.4 and E3ME Model Manual5. Assumptions for all scenarios are described in Supplementary Note 3.

**Supplementary Note 2: FTT Module**

To simulate the technological diffusion details in the energy and industrial sectors, E3ME integrates the FTT model (Future Technology Transformations). For example, in the power sector, the FTT model can be used to predict the process of renewable energy replacing fossil fuels, while in the industrial sector, the FTT model can assess how new technologies (such as hydrogen metallurgy and electric arc furnaces) impact the production methods, cost structures6,7.

The FTT (Future Technology Transformations) model does not use simple cost optimization methods but instead employs Lotka-Volterra competition equations (a nonlinear differential equation used to describe species competition). This approach allows technology diffusion to accumulate gradually over time, rather than happening instantaneously. The FTT model assumes that agents (enterprises or individuals) are influenced by their preferences when comparing different technology options in the market. These preferences are not solely based on the lowest cost principle but are also influenced by factors such as market dominance, user experience, and infrastructure availability. Investor preferences, together with replacement frequency and lagging market share, determine new market shares through competition. The following formula illustrates the transfer of technological shares between categories in the steel and power sectors:

Individuals (agents) using a particular technology (such as power generation, transportation, household heating, etc.) may consider replacing old technologies with new ones, considering market dominance, user experience, infrastructure availability, and other factors:

Here, the proportion (market share) of individuals using technology i (or j) is represented as (or); is the replacement frequency matrix, which is a function of technology lifespan and reflects the ease of substitution;is the preference probability of the agent when choosing different options, a score between 0 and 1, specifically related to the cost C, and is represented as:

andare the LCOS of the technologies i and technology j, andis a scale parameter for decision uncertainty. The equation calculates the selection probability based on the perceived cost distribution among agents, where cost differences must be significant enough to drive the substitution process, otherwise individuals will tend to choose randomly. The calculation of LCOS is as follows:

represent the upfront investment costs for steelmaking technology j in the steel sector (s).denotes operation and maintenance costs, is the fuel cost, is steel production, is the discount rate andis the total project lifetime. The electricity price will influence the fuel cost of technology, which in turn affects the composition of end-use technologies.

**Supplementary Note 3: Scenario Design**

| **Sector** | **Policy Measure** | **Specific Requirements** |
| --- | --- | --- |
| Carbon Tax | Global Carbon Price (applied to sectors taking mitigation actions) | From 2020, the global carbon price will increase linearly from 68 €/toe to 1955 €/toe by 2033, then remain stable. |
| **Transport** | Middle Distillate Fuel Tax | Additional fuel tax imposed. |
|  | Biomass Co-firing Electric Vehicles | Co-firing rate increases linearly to 50%. |
|  | Electric Vehicle Subsidy | EU: $7000/vehicle; Non-EU: $8860.80-$13122.70/vehicle. |
|  | Road Tax | Increases with engine size. |
|  | Ban on Traditional Fuel Vehicles | Full phase-out by 2040. |
|  | Government Procurement of Electric Vehicles | 10% of sales. |
| **Steel** | CCS Investment Subsidy | 10% subsidy, phased out gradually from 2035 to 2050. |
|  | Electricity and Hydrogen Use Subsidy | 5% and 10% subsidies respectively, phased out gradually from 2035 to 2045. |
|  | Public Procurement of Low-Carbon Steel Plants | Support for the development of low-carbon technologies. |
| **Power** | Wind Power Price Subsidy | 10% subsidy. |
|  | Phase-out of Coal-Fired Power Plants | Implemented across all regions. |
|  | Hydropower Investment Cap | Set based on regional resource potential. |
|  | Other Renewable Energy | Capital Subsidy for Geothermal, Concentrated Solar Power, Biomass, Wave, and Tidal Energy |
|  | Public Procurement of New Clean Power Generation Technologies | Promote market development. |
| **Heating** | Renewable Energy Heating Support | Ensure market participation. |
|  | Renewable Boiler Investment Subsidy | 25% subsidy, phased out gradually from 2030 to 2050. |
|  | Regional Heating and Solar Thermal Investment Cap | Set based on regional potential. |
|  | Fossil Fuel Boiler Emission Tax | Increases annually based on emission factors, fixed after 2050. |

*The scenarios in this paper refer to Mercure et al.8 and Knobloch et al.9.For Energy efficiency: the energy efficiency of non-FTT sectors is assumed to change in line with the IEA10, with corresponding investments in the respective sectors.

**Supplementary Figure 1:** **LCOE, LCOS and steelmaking technology choices in different scenarios.**


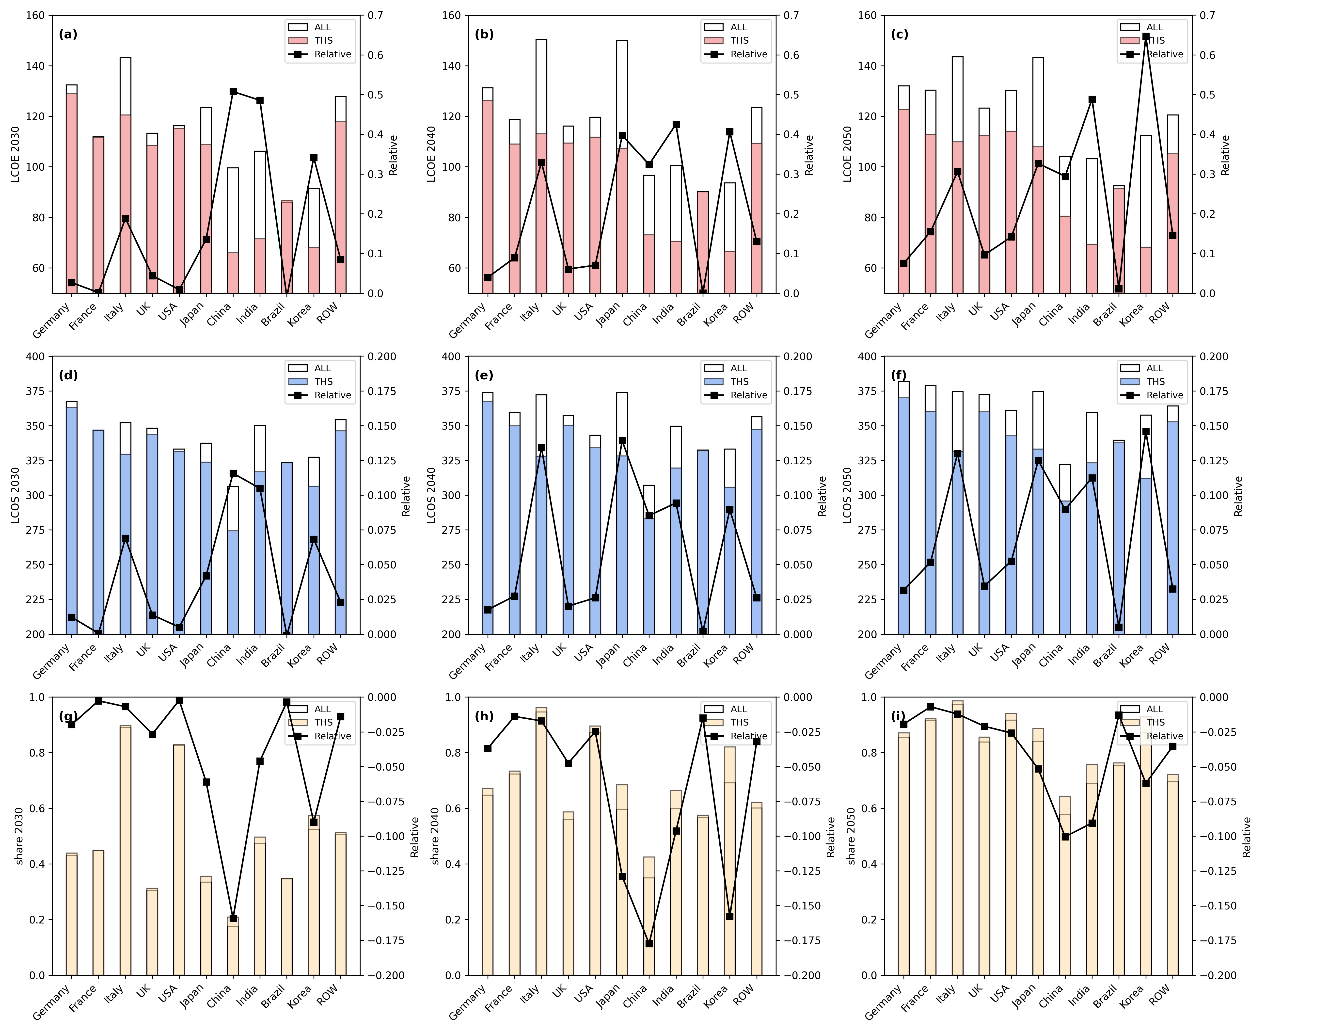


This figure focuses on complementing the longitudinal time comparison between the two scenarios. It first focuses on the LCOE projections for the power system in different countries. The evolution of power system LCOE is influenced by a number of factors, including energy mix, technological advances, policy direction, and resource endowments. In the scenario without power transition, the evolution of electricity costs over time in each country is correlated with the historical generation mix, but the magnitude of change is small. In countries dominated by renewable energy, such as France, which is dominated by nuclear energy, and Brazil, which is dominated by hydropower, the stability of nuclear energy and hydropower keeps the cost of electricity generation low, (e.g., Brazil's LCOE ranges from 85.90-91.43). The LCOE costs of fossil-dominated countries, such as China, are affected by the fact that fossil energy prices are more susceptible to market fluctuations or supply chain influences, leading to an increase in LCOE over time in this scenario.

**Supplementary Figure 2: Steel and electricity production changes.**


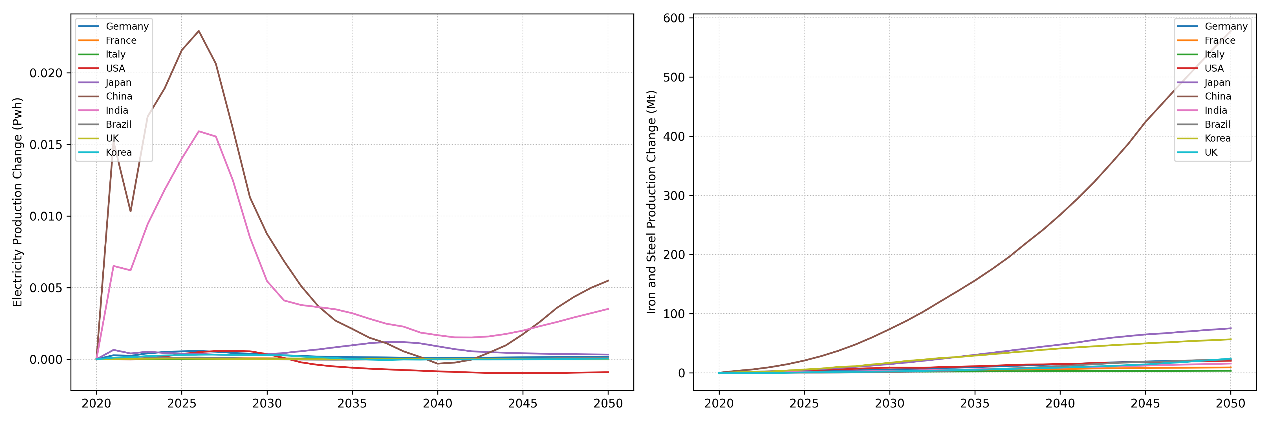


The E3ME model combines intermediate, investment, consumer, export and import demand to calculate future steel demand. Electricity infrastructure development leads to an increase in steel production, with a cumulative incremental steel production of 462.0 million tons from 2020-2050, in line with previous studies11. The increase in steel production is particularly high in the pre-power transition period due to large-scale investments in new energy technologies, peaking at 40.9 Mt around 2026. This is especially notable in China and India, where there is significant demand for clean power development. At the same time, we simulate the changes in power generation caused by the steel transition. Electrification transitions in the steel industry always cause a rise in electricity production, with the largest rise in China.

**Supplementary Figure 3: Iron and steel carbon intensity.**


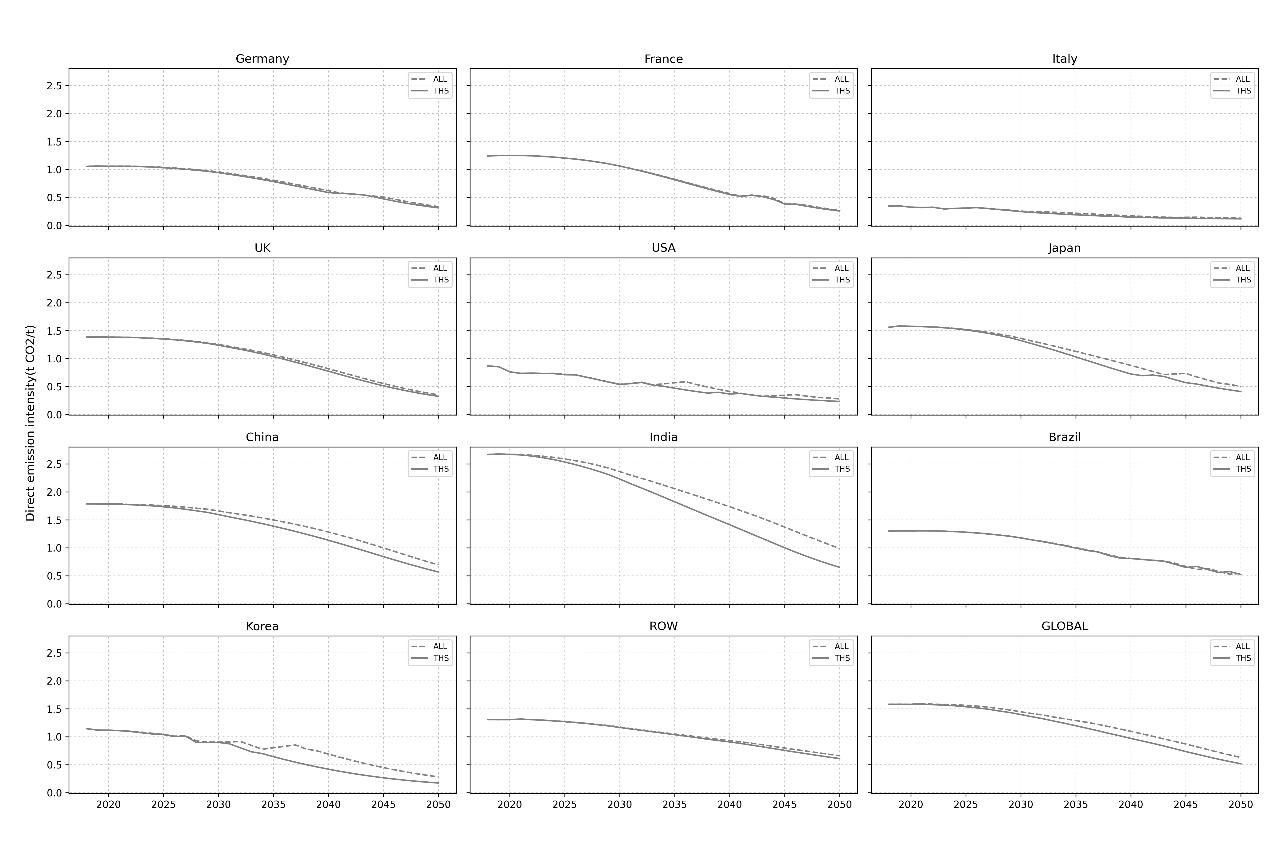


The higher direct emissions intensity in the ALL scenario is mainly due to the negative effect of electricity prices. The carbon emissions gap is more pronounced in China, India and South Korea.

**Supplementary Figure 4: Electricity carbon intensity.**


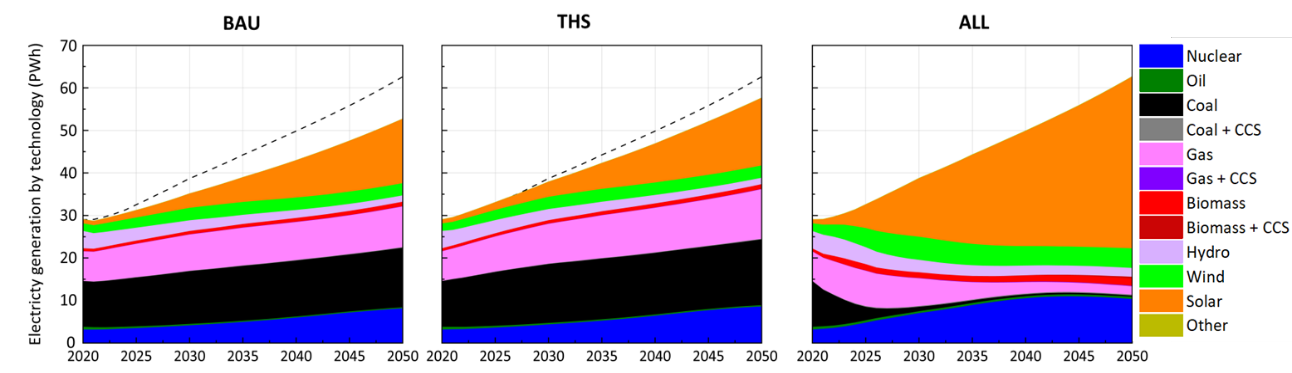


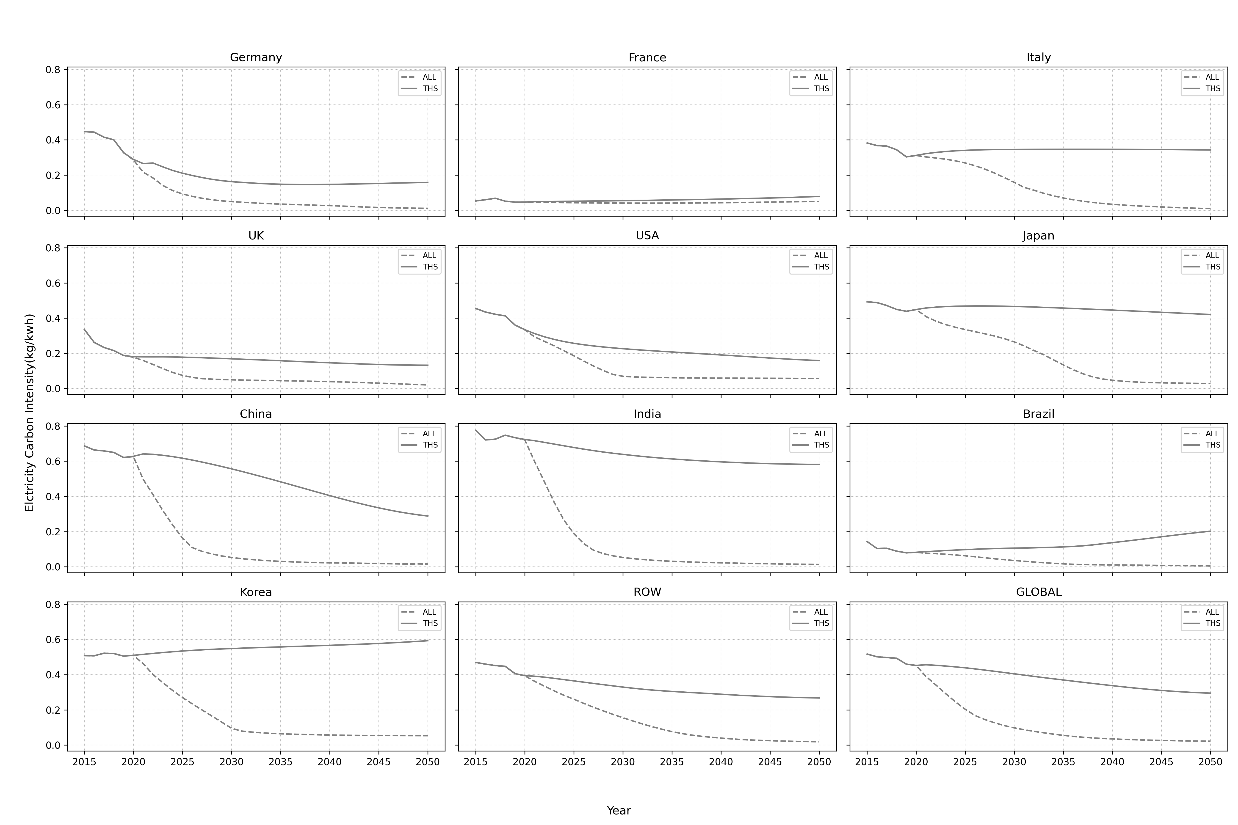


The implementation of the transformation of the electricity sector, the imposition of energy taxes on sectoral emissions and the subsidization of renewable energies have accelerated the diffusion of solar photovoltaic (PV), which is progressively the least expensive production technology in terms of LCOE costs, depending on the regional accumulation of investments in research and development and the abundance of solar energy resources. Photovoltaic occupies the majority of the market, followed by biomass (as a pipeline for negative emissions) and wind (which in our scenario is gradually replaced by photovoltaic). The growth of hydropower is limited by the number of undammed rivers that can be dammed, while other renewable energy sources have low or uncompetitive potential (geothermal and ocean-related systems). China, factors, Korea and Japan have seen large declines in electricity emissions intensity.

**References**

1. Eufrasio, RM, EP Kantzas, and NR Edwards et al. Environmental and health impacts of atmospheric CO2 removal by enhanced rock weathering depend on nations “energy mix”, Communications Earth and Environment, 3, Article 106 (2022).
2. Kantzas, EP, M Val Martin, and MR Lomas et al. Substantial carbon drawdown potential from enhanced rock weathering in the United Kingdom, Nature Geoscience, 15, 382–389(2022).
3. Kiss-Dobronyi, B, D Fazekas, and H Pollitt. Macroeconomic assessment of possible Green Recovery scenarios in Visegrad countries, Society and Economy, 43(3), 227–252(2021).
4. Mercure, J.-F. et al. Environmental impact assessment for climate change policy with the simulation-based integrated assessment model E3ME-FTT-GENIE. Energy Strateg. Rev. 20, 195–208 (2018).
5. Cambridge Econometrics. E3ME Model Manual 2022. <https://www.e3me.com/wp-content/uploads/sites/3/2022/12/E3MEManual2022-1.pdf>.
6. Mercure, J. F. FTT:Power: A global model of the power sector with induced technological change and natural resource depletion. Energy Policy, 48, 799-811 (2012).
7. Lam A, Lee S, Mercure J-F, and Cho Y et al. Policies and Predictions for a Low-Carbon Transition by 2050 in Passenger Vehicles in East Asia: Based on an Analysis Using the E3ME-FTT Model. Sustainability, 10(5), 1612 (2018).
8. Mercure, JF., Salas, P., Vercoulen, P. *et al.* Reframing incentives for climate policy action. Nat Energy, 6, 1133–1143 (2021).
9. Knobloch, F., Hanssen, S., Lam, A. *et al.* Net emission reductions from electric cars and heat pumps in 59 world regions over time. Nat Sustain., 3, 437–447 (2020).
10. IEA. Energy Efficiency 2019. (IEA, 2019).
11. Wang, S., Hausfather Z., Davis, S. et al. Future demand for electricity generation materials under different climate mitigation scenarios. *Joule*, 7(2), 309-332 (2023).
